# Supplementary material for: SDOP-DB: a comparative standardized-protocol database for mouse phenotypic analyses
Source: PubMed Central journal article supplement — Bioinformatics. 2010 Mar 1;26(8):1133–4. doi: 10.1093/bioinformatics/btq095 (PMC2853689; doi:10.1093/bioinformatics/btq095), 2010-03-01
Supplement: btq095_1.pdf [file btq095_1.pdf]

Open-field protocols database

[SDOP top page](#)

[Output tab-delimited text](#) [Download MS excel file](#) [Download XML](#) [Expand all](#) [Collapse all](#)

Hide column: SDOP schema Show column: SDOP schema

| SDOP schema                       | Japan Mouse Clinic (JMC)                                 | European Mouse Disease Clinic (EUMODIC)                                                                                      | Miyakawa lab, Kyoto Univ., Japan | Koide lab, NIG, Japan |
|-----------------------------------|----------------------------------------------------------|------------------------------------------------------------------------------------------------------------------------------|----------------------------------|-----------------------|
| General experimental description  |                                                          |                                                                                                                              |                                  |                       |
| Title                             |                                                          |                                                                                                                              |                                  |                       |
| Purpose                           |                                                          |                                                                                                                              |                                  |                       |
| Source                            |                                                          |                                                                                                                              |                                  |                       |
| Reference information             |                                                          |                                                                                                                              |                                  |                       |
| Phenotyping pipeline              |                                                          |                                                                                                                              |                                  |                       |
| Specific experimental description |                                                          |                                                                                                                              |                                  |                       |
| Mice being tested                 |                                                          |                                                                                                                              |                                  |                       |
| Equipment                         |                                                          |                                                                                                                              |                                  |                       |
| Consumables                       |                                                          |                                                                                                                              |                                  |                       |
| Experiment                        |                                                          |                                                                                                                              |                                  |                       |
| Notes                             |                                                          |                                                                                                                              |                                  |                       |
| Quality control                   |                                                          |                                                                                                                              |                                  |                       |
| Experimental data description     |                                                          |                                                                                                                              |                                  |                       |
| Measured parameters               | 1 : Refer to <a href="#">Pheno-Pub Phenotypic Viewer</a> | 1 : Refer to <a href="#">Europhenome Phenome Data Viewer</a><br>2 : Refer to <a href="#">Eumorphia Baseline Data Browser</a> |                                  |                       |
| Data analysis                     |                                                          |                                                                                                                              |                                  |                       |

Click on “Equipment” to see the more detailed view

| SDOP schema        | Japan Mouse Clinic (JMC)                                                                                                        | European Mouse Disease Clinic (EUMODIC)                                                                                                                                                                                                                                               | Miyakawa lab, Kyoto Univ., Japan                                                                                            | Koide lab, NIG, Japan                                                                                                 |
|--------------------|---------------------------------------------------------------------------------------------------------------------------------|---------------------------------------------------------------------------------------------------------------------------------------------------------------------------------------------------------------------------------------------------------------------------------------|-----------------------------------------------------------------------------------------------------------------------------|-----------------------------------------------------------------------------------------------------------------------|
| Open-field arena   | and 32 cm in height (O'Hara and Co., Ltd.). The ceiling is kept open and the floor is a removable tray, which is easy to clean. | approximately 50 cm high. 3) Arena floor should not be completely smooth that would not enable animals to move freely. 4) The base colour of the open field should not be white. Light grey (e.g. RAL 7035) compensates for various coat colours, if a video-tracking system is used. | in length, [40] cm in depth, and [30] cm in height. The color of floor and wall are [white] and [transparent] respectively. | in length, [60] cm in depth, and [40] cm in height. The color of floor and wall are [white] and [white] respectively. |
| Size               |                                                                                                                                 |                                                                                                                                                                                                                                                                                       |                                                                                                                             |                                                                                                                       |
| Depth (cm)         | 40                                                                                                                              | no smaller than 44                                                                                                                                                                                                                                                                    | 40                                                                                                                          | 60                                                                                                                    |
| Width (cm)         | 40                                                                                                                              | no smaller than 44                                                                                                                                                                                                                                                                    | 40                                                                                                                          | 60                                                                                                                    |
| Height (cm)        | 32                                                                                                                              | approximately 50                                                                                                                                                                                                                                                                      | 30                                                                                                                          | 40                                                                                                                    |
| Shape              | box                                                                                                                             | box                                                                                                                                                                                                                                                                                   | box                                                                                                                         | box                                                                                                                   |
| Floor feature      |                                                                                                                                 |                                                                                                                                                                                                                                                                                       |                                                                                                                             |                                                                                                                       |
| Color              | white                                                                                                                           | Light grey (e.g. RAL 7035) (if a video-tracking system is used.)                                                                                                                                                                                                                      | white                                                                                                                       | white                                                                                                                 |
| Material           | polyvinylchloride plastic board                                                                                                 | polyvinylchloride plastic board                                                                                                                                                                                                                                                       | polyvinylchloride plastic board                                                                                             | polyvinylchloride plastic board                                                                                       |
| Transparency (%)   | 0                                                                                                                               | no description                                                                                                                                                                                                                                                                        | 0                                                                                                                           | 0                                                                                                                     |
| Shape              | square                                                                                                                          | square                                                                                                                                                                                                                                                                                | square                                                                                                                      | square                                                                                                                |
| Texture of surface | smooth                                                                                                                          | smooth                                                                                                                                                                                                                                                                                | smooth                                                                                                                      | smooth                                                                                                                |
| Wall feature       |                                                                                                                                 |                                                                                                                                                                                                                                                                                       |                                                                                                                             |                                                                                                                       |
| Color              | white                                                                                                                           | opaque                                                                                                                                                                                                                                                                                | transparent                                                                                                                 | white                                                                                                                 |
| Material           | polyvinylchloride plastic board                                                                                                 | no description                                                                                                                                                                                                                                                                        | polyvinylchloride plastic board                                                                                             | polyvinylchloride plastic board                                                                                       |
| Transparency (%)   | 0                                                                                                                               | 0                                                                                                                                                                                                                                                                                     | 100                                                                                                                         | 0                                                                                                                     |
| Shape              | square                                                                                                                          | square                                                                                                                                                                                                                                                                                | square                                                                                                                      | square                                                                                                                |
| Texture of surface | smooth                                                                                                                          | no description                                                                                                                                                                                                                                                                        | smooth                                                                                                                      | smooth                                                                                                                |

**Supplementary Fig.1.** An example of detailed comparison of protocols in the SDOP-DB browser. The example shown is for “Equipment” in the SDOP of open-field test. The SDOP-DB allows users to provide detailed protocol differences among institutes/laboratories.
