# Supplementary material for: SDOP-DB: a comparative standardized-protocol database for mouse phenotypic analyses
Source: PubMed Central journal article supplement — Bioinformatics. 2010 Mar 1;26(8):1133–4. doi: 10.1093/bioinformatics/btq095 (PMC2853689; doi:10.1093/bioinformatics/btq095), 2010-03-01
Supplement: btq095_2.pdf [file btq095_2.pdf]

| SDOP schema                   | Japan Mouse Clinic (JMC)                                          | European Mouse Disease Clinic (EUMODIC)                                                                     |
|-------------------------------|-------------------------------------------------------------------|-------------------------------------------------------------------------------------------------------------|
| Experimental data description |                                                                   |                                                                                                             |
| Measured parameters           |                                                                   |                                                                                                             |
| Latency                       | measured                                                          | measured                                                                                                    |
| Description                   | The latency to the first incidence of hind paw licking or jumping | The latency of the first reaction (lick, shake, jump) is recorded (cut off for the first trial 30 seconds). |
| Unit                          | seconds                                                           | seconds                                                                                                     |
| Data                          | 1: <a href="#">Pheno-Pub Phenotypic Viewer</a>                    | 1: <a href="#">Europhenome Phenome Data Viewer</a>                                                          |
| Type of response              | recorded, but not disclosed                                       | recorded                                                                                                    |
| Body weight                   | not measured                                                      | measured                                                                                                    |
| Comments on other behaviours  | recorded                                                          | recorded                                                                                                    |
| Data analysis                 |                                                                   |                                                                                                             |

Easy access to experimental results through hyperlinks

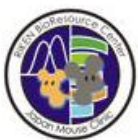

RIKEN BioResource Center  
Japan Mouse Clinic

[JMC-Home](#) / [Pheno-pub-Home](#) / [About Pheno-pub](#) / [What's new](#)

[Top Menu](#) -> [Preference](#) -> [Draw Graph](#)

Phenotypic viewer of the differences among strains

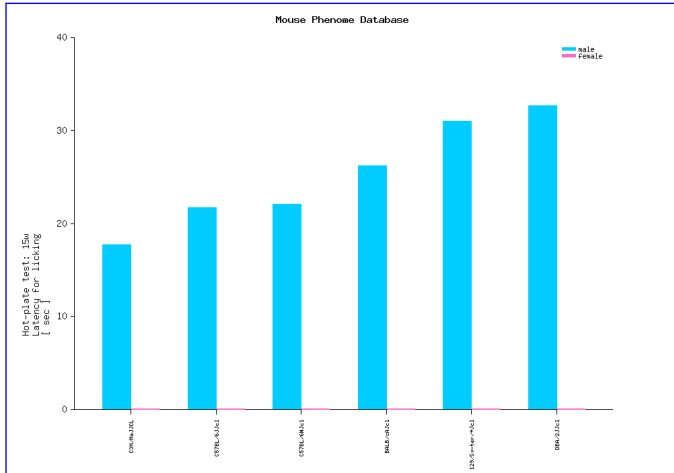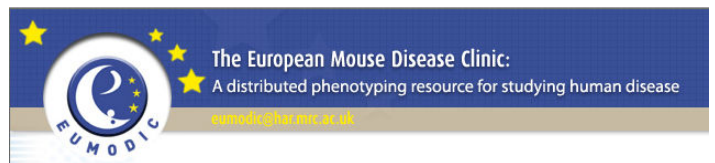

Hot Plate - [Show Metadata](#) - [View Data](#)

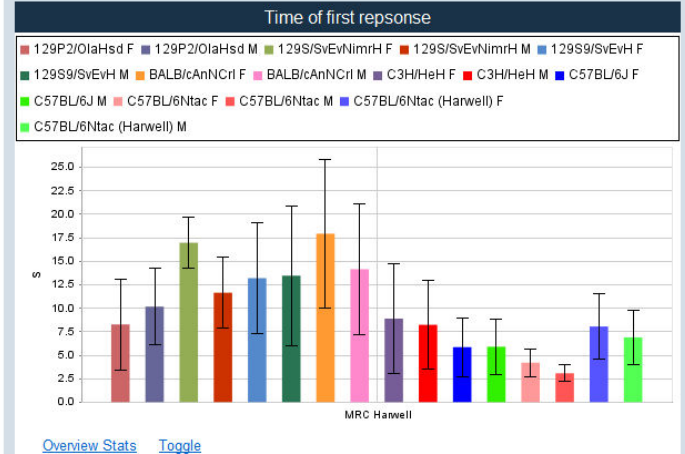

**Supplementary Fig. 2.** Visualisation of protocol differences in “Measured parameters” between JMC and EUMODIC in hot plate tests. Here users can easily explore differences in results between institutes through hyperlinks. Focusing on results from the same strain, users are able to conclude that the differences in data can be attributed to differences in definitions used in measuring the parameter of “Latency”.
